# Supplementary material for: PET neuroimaging reveals histone deacetylase dysregulation in schizophrenia
Source: JCI journal article supplement (doi:10.1172/jci123743), 2018-12-09
Supplement: sd2 [file 2]

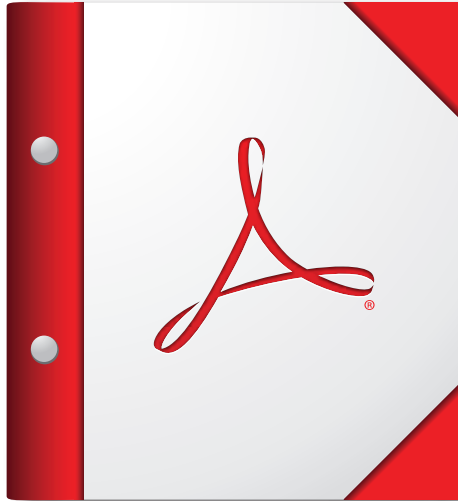

**For the best experience, open this PDF portfolio in  
Acrobat X or Adobe Reader X, or later.**

[Get Adobe Reader Now!](#)
